# Supplementary material for: Evaluation of Appendicular Muscle Mass in Sarcopenia in Older Adults Using Ultrasonography: A Systematic Review and Meta-Analysis
Source: PubMed Central journal article supplement — Gerontology. 2022 Jul 25;68(10):1174–98. doi: 10.1159/000525758 (PMC9677864; doi:10.1159/000525758), 2022-07-25
Supplement: ger-0068-1174-s05.pdf [file ger-0068-1174-s05.pdf]

Deeks' Funnel Plot Asymmetry Test  
pvalue = 0.03

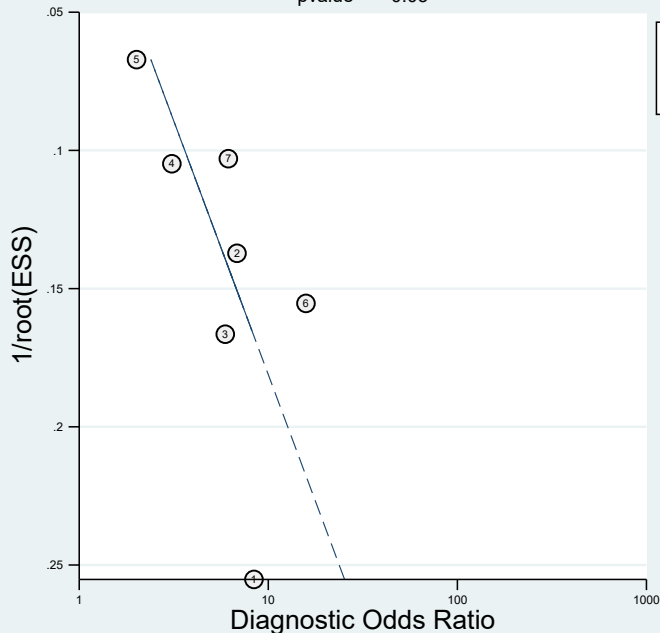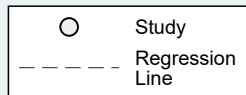

Fig. S3. Deeks' funnel plot asymmetry test of the diagnosis of quadriceps femoris thickness on ultrasound for sarcopenia

①: Fukumoto 2021[32]/Female, ②: Fukumoto 2021[32]/Male, ③: Yamada 2017[66]/Female, ④: Yamada 2017[66]/Male, ⑤: Hida 2018[42]/Female, ⑥: Barotisis 2020[47]/Total, ⑦: Hida 2018[42]/Male.
