# Supplementary material for: Evaluation of Appendicular Muscle Mass in Sarcopenia in Older Adults Using Ultrasonography: A Systematic Review and Meta-Analysis
Source: PubMed Central journal article supplement — Gerontology. 2022 Jul 25;68(10):1174–98. doi: 10.1159/000525758 (PMC9677864; doi:10.1159/000525758), 2022-07-25

Fig. S6. Trim and fill test of muscle thickness on ultrasound and muscle mass on reference techniques

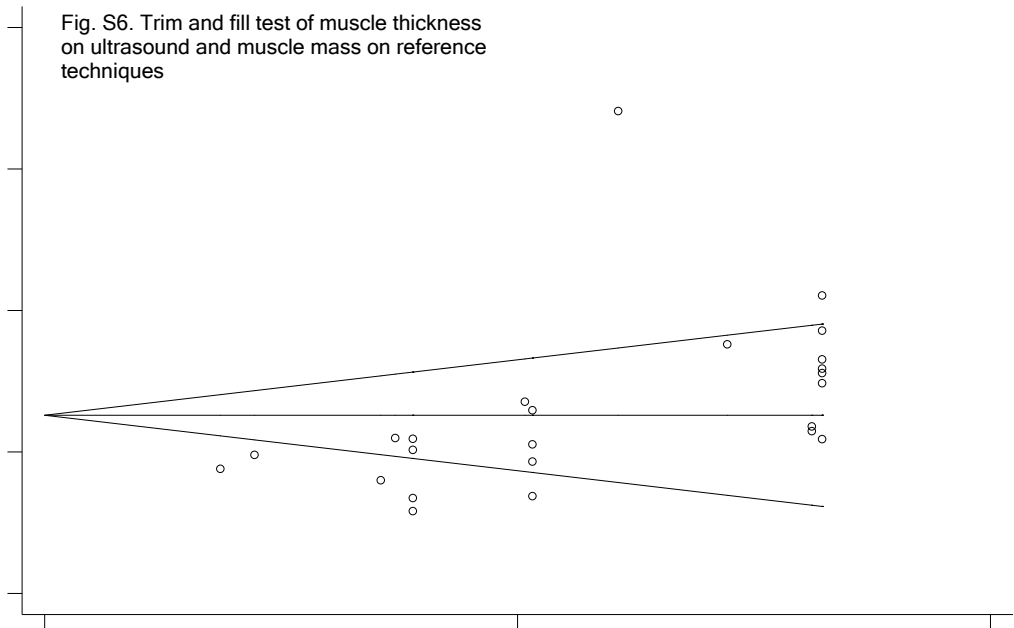

Supplement: ger-0068-1174-s08.pdf [file ger-0068-1174-s08.pdf]
